# Supplementary material for: Application of problem-based learning and case-based learning integrated method in the teaching of maxillary sinus floor augmentation in implant dentistry
Source: PeerJ. 2020 Jan 16;8:e8353. doi: 10.7717/peerj.8353 (PMC6970006; doi:10.7717/peerj.8353)
Supplement: Supplemental Information 1 [file peerj-08-8353-s001.xlsx]

## Sheet: Sheet1
NO.	theory test	case analysis test
experimental group1	83	77
experimental group2	85	73
experimental group3	80	79
experimental group4	81	83
experimental group5	78	76
experimental group6	79	77
experimental group7	77	79
experimental group8	83	83
experimental group9	88	74
experimental group10	80	78
experimental group11	79	76
experimental group12	83	72
experimental group13	82	73
experimental group14	78	75
experimental group15	76	80
experimental group16	81	77
experimental group17	80	75
experimental group18	83	77
experimental group19	73	75
experimental group20	83	81
experimental group21	78	69
experimental group22	82	75
experimental group23	82	77
experimental group24	85	73
experimental group25	80	73
experimental group26	82	75
experimental group27	78	80
experimental group28	79	77
experimental group29	84	75
experimental group30	77	78
experimental group31	78	76
experimental group32	82	72
experimental group33	82	73
experimental group34	84	75
experimental group35	80	80
experimental group36	84	72
experimental group37	79	73
experimental group38	76	75
experimental group39	80	80
experimental group40	83	77
experimental group41	82	75
experimental group42	79	77
experimental group43	89	78
experimental group44	83	79
experimental group45	74	76
experimental group46	78	80
control group1	76	75
control group2	72	78
control group3	73	74
control group4	75	79
control group5	80	72
control group6	77	73
control group7	73	74
control group8	79	72
control group9	83	70
control group10	76	69
control group11	77	72
control group12	79	76
control group13	69	75
control group14	78	70
control group15	79	72
control group16	84	69
control group17	74	66
control group18	75	74
control group19	77	70
control group20	75	74
control group21	81	72
control group22	69	70
control group23	75	69
control group24	77	72
control group25	73	76
control group26	76	75
control group27	70	66
control group28	80	74
control group29	78	70
control group30	74	74
control group31	80	72
control group32	79	70
control group33	75	69
control group34	73	72
control group35	79	73
control group36	77	74
control group37	77	72
control group38	75	70
control group39	79	69
control group40	83	72
control group41	75	76
control group42	78	75
control group43	74	74
control group44	79	72
control group45	72	70
control group46	73	69
